# Supplementary material for: Discovering biomarkers associated and predicting cardiovascular disease with high accuracy using a novel nexus of machine learning techniques for precision medicine
Source: PubMed Central journal article supplement (PMC10762256; doi:10.1038/s41598-023-50600-8), 2024-01-02
Supplement: 41598_2023_50600_MOESM1_ESM.pdf [file 41598_2023_50600_MOESM1_ESM.pdf]

## **Supplementary Information**

Separate Excel files are attached including:

**Supplementary material 1:** Dataset

**Supplementary material 2:** Biomarkers

**Supplementary material 3:** Classifier Metrics

**Supplementary material 4:** Gene-Disease-ICD
